# Supplementary material
Source: publisher figshare collection journal article supplement (https://acs.figshare.com/ndownloader/files/4631641)
Supplement: Supplementary file 1 [file 4631641]

## Supporting Information for

# One-Pot Syntheses of 2,3-Dihydrothiopyran-4-one Derivatives by Pd/Cu-Catalyzed Reactions of $\alpha,\beta$ -Unsaturated Thioesters with Propargyl Alcohols

Yasunori Minami, Hitoshi Kuniyasu,\* and Nobuaki Kambe\*

*Department of Molecular Chemistry & Frontier Research Center, Graduate School of Engineering, Osaka University, Suita, Osaka 565-0871, Japan*

**General Comments:**  $^1\text{H}$  and  $^{13}\text{C}$  NMR spectra in  $\text{CDCl}_3$ , and  $\text{DMF-}d_8$  solution were recorded with JEOL JNM-Alice 400 (400 MHz) spectrometers. The chemical shifts in the  $^1\text{H}$  NMR spectra were recorded relative to  $\text{Me}_4\text{Si}$  as an internal standard and the chemical shifts in the  $^{13}\text{C}$  NMR spectra were recorded relative to  $\text{CHCl}_3$  ( $\delta$  77.0). The IR spectra was measured by a Perkin-Elmer Model 1600 spectrometer. Mass spectra (EI), High-resolution mass spectra (HRMS) and elemental analyses were performed in the Instrumental Analysis Center of the Faculty of Engineering, Osaka University. Melting points were measured by a MPA100 Optimelt Automated Melting Point System. Preparative TLC was carried out using Wakogel B-5F silica gel. The X-ray crystal data of **3a** were collected using Rigaku RAXIS-RAPID Imaging Plate diffractometer. The ORTEP diagram was shown in 50% probability ellipsoid. All reactions were carried out under  $\text{N}_2$  atmosphere. All solvents were distilled before use. Thioesters **1a-d**, **1f** were prepared from the reactions of the corresponding acid chlorides with thiols in the presence of pyridine in THF solution. Thioester **1e** was synthesized according to the literature (*Tetrahedron Lett.* **2001**, 42, 1567).

## The Spectrum Datas of thioesters:

**H<sub>2</sub>C=C(Me)C(O)SC<sub>6</sub>H<sub>4</sub>NO<sub>2</sub>-*p* (1a); registry number 893445-27-7.**

**H<sub>2</sub>C=C(*i*-Pr)C(O)SC<sub>6</sub>H<sub>4</sub>NO<sub>2</sub>-*p* (1b); registry number 893445-29-9.**

**(*E*)-PhC(H)=CHC(O)SC<sub>6</sub>H<sub>4</sub>NO<sub>2</sub>-*p* (1c); registry number 95390-11-7.**

**(*E*)-Me(H)C=C(Me)C(O)SC<sub>6</sub>H<sub>4</sub>NO<sub>2</sub>-*p* (1d):** an pale yellow solid; mp 77 °C; <sup>1</sup>H NMR (400 MHz, CDCl<sub>3</sub>) δ 1.91 (d, 3 H), 1.92 (s, 3 H), 6.98-7.04 (m, 1 H), 7.61 (d, 2 H, *J* = 8.8 Hz), 8.24 (d, 2 H, *J* = 8.8 Hz); <sup>13</sup>C NMR(100 MHz, CDCl<sub>3</sub>) δ 12.4, 14.8, 123.9, 135.4, 136.7, 137.2, 138.5, 148.1, 189.3; IR (KBr) 3105, 2925, 2845, 1673, 1643, 1598, 1578, 1518, 1345, 1220, 1108, 1031, 981, 854, 742, 682, 662, 643 cm<sup>-1</sup>; mass spectrum (EI) *m/z* 237 (M<sup>+</sup>, 1.6); HRMS calcd for C<sub>11</sub>H<sub>11</sub>OS 237.2760, found 237.0458.

**H<sub>2</sub>C=C(C<sub>6</sub>H<sub>4</sub>Me-*p*)C(O)SC<sub>6</sub>H<sub>4</sub>Me-*p* (1e):** an pale yellow solid; mp 92 °C; <sup>1</sup>H NMR (400 MHz, CDCl<sub>3</sub>) δ 2.37 (s, 3 H), 2.38 (s, 3 H), 5.83 (s, 1 H), 6.24 (s, 1 H), 7.17 (d, 2 H, *J* = 8.1 Hz), 7.23 (d, 2 H, *J* = 8.3 Hz), 7.32-7.35 (m, 4 H); <sup>13</sup>C NMR(100 MHz, CDCl<sub>3</sub>) δ 21.5, 21.6, 122.7, 124.7, 128.4, 129.2, 130.3, 133.1, 134.8, 138.9, 139.9, 148.0, 192.5; IR (KBr) 3026, 2918, 1684, 1605, 1510, 1397, 1296, 1110, 963, 925, 824, 807, 750, 731, 554, 484 cm<sup>-1</sup>; mass spectrum (EI) *m/z* 268 (M<sup>+</sup>, 12); HRMS calcd for C<sub>17</sub>H<sub>16</sub>OS 268.0922, found 268.0924.

**(*E*)-PhC(H)=CHC(O)SC<sub>10</sub>H<sub>21</sub>-*n* (1f):** an pale yellow solid; mp 41 °C; <sup>1</sup>H NMR (400 MHz, CDCl<sub>3</sub>) δ 0.88 (t, 3 H, *J* = 6.4 Hz), 1.26-1.40 (m, 15 H), 1.60-1.67 (m, 2 H), 3.01 (t, 2 H, *J* = 7.3 Hz), 6.71 (d, 1 H, *J* = 15.9 Hz), 7.38-7.39 (m, 3 H), 7.53-7.54 (m, 2 H), 7.60 (d, 2 H, *J* = 8.1 Hz); <sup>13</sup>C NMR(100 MHz, CDCl<sub>3</sub>) δ 14.1, 14.2, 22.7, 28.9, 29.0, 29.2, 29.3, 29.6, 29.6, 31.9, 125.2, 128.4, 128.9, 130.4, 134.2, 140.1, 190.0; IR (KBr) 2922, 2848, 1656, 1611, 1468, 1448, 1332, 1302, 1035, 1012, 992, 890, 778, 754, 692, 578, 484, 462 cm<sup>-1</sup>; mass spectrum (EI) *m/z* 304 (M<sup>+</sup>, 12); HRMS calcd for C<sub>19</sub>H<sub>28</sub>OS 304.1861, found 304.1863.

**Pd/Cu-Catalyzed Reaction of CH<sub>2</sub>=C(Me)C(O)SC<sub>6</sub>H<sub>4</sub>NO<sub>2</sub>-*p* (1a) with HC≡CC(Me)<sub>2</sub>OH (2a) in the presence of Et<sub>3</sub>N and K<sub>2</sub>CO<sub>3</sub> (run 3 of Table 1); General Procedure of Cyclization of α,β-Unsaturated Thioesters with Propargyl Alcohols:** Into a two-necked 3 mL reaction glass were added PdCl<sub>2</sub> (0.7 mg, 4 × 10<sup>-3</sup> mmol), CuI (7.5 mg, 3.9 × 10<sup>-2</sup> mmol), K<sub>2</sub>CO<sub>3</sub> (6.1 mg, 4.4 × 10<sup>-2</sup> mmol), **1a** (89.5 mg, 0.401 mmol), **2a** (50 μL, 0.52 mmol), Et<sub>3</sub>N (60 μL, 0.43 mmol) and 0.5 mL of DMF under N<sub>2</sub> atmosphere. After the solution was stirred for 6 h at 80 °C, the reaction mixture was separated by preparative TLC using hexane and Et<sub>2</sub>O (10/7) as an eluent (74.5 mg, 60%).

**2,3-dihydro-3-methyl-6-(dimethyl-*p*-nitrophenoxy-methyl)-thiopyran-4-one (3a):** an yellow solid; mp 111 °C; <sup>1</sup>H NMR (400 MHz, CDCl<sub>3</sub>) δ 1.25 (d, 3 H, *J* = 6.8 Hz), 1.72 (s, 6 H), 2.62-2.68 (m, 1 H), 3.02 (dd, 1 H, *J* = 13, 11 Hz), 3.19 (dd, 1 H, *J* = 13, 3.9 Hz), 6.28 (s, 1 H), 6.94 (d, 2 H, *J* = 9.3 Hz), 8.14 (d, 2 H, *J* = 9.3 Hz); <sup>13</sup>C NMR(100 MHz, CDCl<sub>3</sub>) δ 14.30, 27.61, 28.34, 33.64, 39.53, 81.80, 118.0, 119.4, 125.2, 141.7, 160.3, 166.6, 196.6; IR (KBr) 2983, 2965, 2927, 1665, 1588, 1508, 1488, 1345, 1249, 1186, 1143, 949, 924, 867, 852, 752, 672 cm<sup>-1</sup>; mass spectrum (EI) *m/z* 307 (M<sup>+</sup>, 21); Anal. Calcd for C<sub>15</sub>H<sub>17</sub>NO<sub>4</sub>S: C, 58.61; H, 5.57, N, 4.56, S, 10.43. Found: C, 58.32; H, 5.29, N, 4.53, S, 10.44. Other cyclic products **3b-3e**, **3g-3j** were similarly synthesized. Samples of **3d**, **3e**, **3i** and **3j** obtained after preparative TLC were a mixture of *threo* and *erythro*.

**2,3-dihydro-3-methyl-6-(1'-*p*-nitrophenoxy-cyclopentyl)-thiopyran-4-one (3b):** an yellow solid; mp 89 °C; <sup>1</sup>H NMR (400 MHz, CDCl<sub>3</sub>) δ 1.22 (d, 3 H, *J* = 5.2 Hz), 1.83 (m, 4 h), 2.17-2.25 (m, 4 H), 2.61-2.63 (m, 1 H), 2.98-3.18 (m, 2 H), 6.28 (s, 1 H), 6.88 (d, 2 H, *J* = 7.1 Hz), 8.13 (d, 2 H, *J* = 7.1 Hz); <sup>13</sup>C NMR(100 MHz, CDCl<sub>3</sub>) δ 14.1, 24.2, 24.3, 33.6, 38.59, 39.56, 91.76, 117.2, 119.0, 125.3, 141.4, 160.2, 164.9, 196.6; IR (KBr) 3294, 2968, 2934, 2871, 1657, 1607, 1586, 1567, 1508, 1488, 1342, 1331, 1312, 1236, 1196, 1166, 1112, 982, 850, 838, 752, 694, 655, 631, 586 cm<sup>-1</sup>; mass spectrum (EI) *m/z* 333 (M<sup>+</sup>, 12); Anal. Calcd for C<sub>17</sub>H<sub>19</sub>NO<sub>4</sub>S: C, 61.24; H, 5.74, N, 4.20. Found: C, 61.32; H, 5.46, N, 4.09.

**2,3-dihydro-3-methyl-6-(1'-*p*-nitrophenoxy-cyclohexyl)-thiopyran-4-one (3c):** an yellow solid; mp 105 °C; <sup>1</sup>H NMR (400 MHz, CDCl<sub>3</sub>) δ 1.24 (d, 3 H, *J* = 6.8 Hz), 1.56-1.79 (m, 8 H), 2.33 (t, 2 H, *J* = 13 Hz), 2.61-2.67 (m, 1 H), 3.01 (dd, 1 H, *J* = 13, 11 Hz), 3.17 (dd, 1 H, *J* = 13, 3.9 Hz), 6.30 (s, 1 H), 6.97

(d, 2 H,  $J = 9.0$  Hz), 8.14 (d, 2 H,  $J = 9.0$  Hz);  $^{13}\text{C}$  NMR(100 MHz,  $\text{CDCl}_3$ )  $\delta$  14.36, 21.29, 25.10, 33.60, 34.36, 35.32, 39.63, 82.73, 117.7, 119.2, 125.2, 141.5, 159.9, 167.0, 196.5; IR (KBr) 3116, 3076, 2936, 2851, 1667, 1605, 1589, 1509, 1491, 1451, 1338, 1239, 1146, 1110, 954, 850, 751, 660, 496  $\text{cm}^{-1}$ ; mass spectrum (EI)  $m/z$  347 ( $\text{M}^+$ , 39); HRMS calcd for  $\text{C}_{18}\text{H}_{21}\text{NO}_4\text{S}$  347.4297, found 347.1201. Anal. Calcd for  $\text{C}_{18}\text{H}_{21}\text{NO}_4\text{S}$ : C, 62.23; H, 6.09, N, 4.03. Found: C, 61.95; H, 5.91, N, 4.01.

**2,3-dihydro-3-methyl-6-(methyl-phenyl-*p*-nitrophenoxy-methyl)-thiopyran-4-one (3d):** The title compound was obtained as a mixture of inseparable diastereomers (51:49); an yellow solid; mp 111  $^{\circ}\text{C}$ ;  $^1\text{H}$  NMR (400 MHz,  $\text{CDCl}_3$ )  $\delta$  1.22 (d, 1.5 H,  $J = 6.8$  Hz), 1.23 (d, 1.5 H,  $J = 6.8$  Hz),\* 2.02 (s, 3 H), 2.59-2.65 (m, 1 H), 2.91-3.00 (m, 1 H), 3.02 (dd, 0.5 H,  $J = 13, 4.2$  Hz), 3.13 (dd, 0.5 H,  $J = 13, 3.9$  Hz),\* 6.33 (s, 0.5 H), 6.44 (s, 0.5 H),\* 6.89 (d, 2 H,  $J = 9.3$  Hz), 7.37-7.43 (m, 3 H), 7.51 (d, 2 H,  $J = 7.6$  Hz), 8.06(8.07) (d, 2 H,  $J = 9.3$  Hz);  $^{13}\text{C}$  NMR(100 MHz,  $\text{CDCl}_3$ )  $\delta$  14.21(14.25), 24.08(24.35), 33.92(33.94), 39.67(39.81), 85.04(85.14), 119.0(119.1), 120.3(120.5), 125.3, 125.9(125.9), 128.7(128.8), 128.9, 141.2(141.5), 142.3, 160.1, 167.3(167.3), 197.2; IR (KBr) 2973, 2932, 1668, 1606, 1590, 1509, 1490, 1446, 1344, 1244, 1169, 1112, 1069, 1032, 989, 921, 862, 850, 764, 751, 698, 676, 578, 494  $\text{cm}^{-1}$ ; mass spectrum (EI)  $m/z$  369 ( $\text{M}^+$ , 4.0); Anal. Calcd for  $\text{C}_{20}\text{H}_{19}\text{NO}_4\text{S}$ : C, 65.02; H, 5.18, N, 3.79. Found: C, 64.74; H, 5.04, N, 3.65. \* Minor diastereomer

**2,3-dihydro-3-methyl-6-(*n*-pentyl-*p*-nitrophenoxy-methyl)-thiopyran-4-one (3e):** The title compound was obtained as a mixture of inseparable diastereomers (51:49); an yellow oil;  $^1\text{H}$  NMR (400 MHz,  $\text{CDCl}_3$ )  $\delta$  0.88-0.92 (m, 3 H), 1.19-1.22 (m, 3 H), 1.32-1.55 (m, 6 H), 1.90-2.02 (m, 2 H), 2.59-2.63 (m, 1 H), 2.97-3.07 (m, 1 H), 3.12-3.22 (m, 1 H), 4.71-4.77 (m, 1 H), 6.21 (s, 0.5 H),\* 6.23 (s, 0.5 H), 6.94 (d, 1 H,  $J = 9.3$  Hz),\* 6.96 (d, 1 H,  $J = 9.3$  Hz), 8.17 (d, 1 H,  $J = 9.3$  Hz),\* 8.18 (d, 1 H,  $J = 9.3$  Hz);  $^{13}\text{C}$  NMR(100 MHz,  $\text{CDCl}_3$ )  $\delta$  14.1, 14.4(14.4), 22.5, 25.1(25.2), 31.4(31.4), 33.4(33.7), 36.0(36.1), 39.8(40.2), 80.3(80.6), 115.2, 119.9(119.9), 125.7(125.7), 141.8(141.8), 161.2(161.3), 162.1, 196.0(196.1); IR (NaCl) 2995, 2930, 2860, 1666, 1609, 1591, 1514, 1494, 1456, 1344, 1252, 1174, 112, 1011, 846, 752, 689, 658  $\text{cm}^{-1}$ ; mass spectrum (EI)  $m/z$  349 ( $\text{M}^+$ , 87); Anal. Calcd for  $\text{C}_{18}\text{H}_{23}\text{NO}_4\text{S}$ : C, 61.87; H, 6.63, N, 4.01. Found: C, 61.60; H, 6.46, N, 3.75. \* Minor diastereomer

**2,3-dihydro-3-isopropyl-6-(dimethyl-*p*-nitrophenoxy-methyl)-thiopyran-4-one (3g):** an pale yellow solid; mp 127 °C; <sup>1</sup>H NMR (400 MHz, CDCl<sub>3</sub>) δ 0.97 (d, 3 H, *J* = 6.8 Hz), 0.97 (d, 2 H, *J* = 6.8 Hz), 1.71 (s, 6 H), 2.22-2.26 (m, 1 H), 2.35-2.43 (m, 1 H), 3.13 (dd, 1 H, *J* = 8.8, 3.4 Hz), 3.25 (dd, 1 H, *J* = 14, 3.6 Hz), 6.24 (s, 1 H), 6.93 (d, 2 H, *J* = 9.3 Hz), 8.13 (d, 2 H, *J* = 9.3 Hz); <sup>13</sup>C NMR(100 MHz, CDCl<sub>3</sub>) δ 19.4, 20.3, 25.2, 27.7, 28.0, 28.9, 50.4, 81.8, 118.1, 119.9, 125.3, 141.9, 160.6, 166.3, 196.1; IR (KBr) 2957, 2360, 1660, 1586, 1507, 1489, 1340, 1247, 1139, 1110, 851, 752, 670 cm<sup>-1</sup>; mass spectrum (EI) *m/z* 335 (M<sup>+</sup>, 25); Anal. Calcd for C<sub>17</sub>H<sub>21</sub>NO<sub>4</sub>S: C, 60.87; H, 6.31, N, 4.18. Found: C, 60.74; H, 6.12, N, 4.46.

**2-phenyl-2,3-dihydro-6-(dimethyl-*p*-nitrophenoxy-methyl)-thiopyran-4-one (3h):** an yellow solid; mp 92 °C; <sup>1</sup>H NMR (400 MHz, CDCl<sub>3</sub>) δ 1.72 (s, 6 H), 2.95 (dd, 1 H, *J* = 17, 3.4 Hz), 3.08 (dd, 1 H, *J* = 17, 13 Hz), 4.62 (dd, 1 H), 6.40 (s, 1 H), 6.91 (d, 2 H, *J* = 9.3 Hz), 7.34-7.37 (m, 5 H), 8.00 (d, 2 H, *J* = 9.3 Hz); <sup>13</sup>C NMR(100 MHz, CDCl<sub>3</sub>) δ 27.4, 28.2, 43.6, 46.3, 81.8, 118.3, 120.0, 125.3, 127.4, 128.6, 128.9, 137.3, 141.9, 160.4, 167.3, 194.7; IR (KBr) 3066, 2990, 1659, 1606, 1590, 1565, 1506, 1489, 1454, 1384, 1340, 1296, 1257, 1137, 1108, 929, 891, 856, 751, 725, 698, 670, 495 cm<sup>-1</sup>; mass spectrum (EI) *m/z* 369 (M<sup>+</sup>, 21); Anal. Calcd for C<sub>20</sub>H<sub>19</sub>NO<sub>4</sub>S: C, 65.02; H, 5.18, N, 3.79. Found: C, 65.09; H, 5.34, N, 3.73.

**2,3-dihydro-2,3-dimethyl-6-(dimethyl-*p*-nitrophenoxy-methyl)-thiopyran-4-one (3i):** The title compound was obtained as a mixture of inseparable diastereomers (55:45); an yellow solid; mp 84 °C; <sup>1</sup>H NMR (400 MHz, CDCl<sub>3</sub>) δ 1.14 (d, 1.4 H, *J* = 7.1 Hz),\* 1.25 (d, 1.6 H, *J* = 7.1 Hz), 1.32 (d, 1.4 H, *J* = 7.1 Hz),\* 1.42 (d, 1.6 H, *J* = 7.1 Hz), 1.71 (s, 6 H), 2.40-2.46 (m, 0.6 H), 2.67-2.70 (m, 0.4 H),\* 3.22-3.28 (m, 0.6 H), 3.58-3.61 (m, 0.4 H),\* 6.25 (s, 0.4 H),\* 6.26 (s, 0.6 H), 6.94 (d, 0.9 H, *J* = 9.3 Hz),\* 6.94 (d, 1.1 H, *J* = 9.3 Hz), 8.13 (d, 2 H, *J* = 9.3 Hz); <sup>13</sup>C NMR(100 MHz, CDCl<sub>3</sub>) δ 9.89(15.2), 13.0(18.9), 27.6(27.9), 27.8(27.9), 41.5(44.8), 42.8(46.5), 81.7(81.7), 118.0(118.0), 118.6(118.8), 125.3, 141.8, 160.1, 164.8(165.8), 197.2(198.1); IR (KBr) 3092, 2988, 2931, 1664, 1607, 1587, 1514, 1489, 1445, 1344, 1251, 1222, 1198, 1185, 1141, 1113, 947, 930, 869, 851, 752, 670, 612, 548, 495 cm<sup>-1</sup>; mass spectrum (EI) *m/z* 321 (M<sup>+</sup>, 14); Anal. Calcd for C<sub>16</sub>H<sub>19</sub>NO<sub>4</sub>S: C, 59.79; H, 5.96, N, 4.36. Found:

C, 59.51; H, 5.58, N, 4.21. \* Minor diastereomer

**2,3-dihydro-2,3-dimethyl-6-(1'-*p*-nitrophenoxy-cyclohexyl)-thiopyran-4-one (3j):** The title compound was obtained as a mixture of inseparable diastereomers (72:28); an yellow oil; <sup>1</sup>H NMR (400 MHz, CDCl<sub>3</sub>) δ 1.14 (d, 2.2 H, *J* = 7.1 Hz), 1.24 (d, 0.8 H, *J* = 7.1 Hz),\* 1.32 (d, 2.2 H, *J* = 7.1 Hz), 1.42 (d, 0.8 H, *J* = 7.1 Hz),\* 1.56-1.80 (m, 8 H), 2.32 (d, 2 H, *J* = 14 Hz), 2.41-2.48 (m, 0.3 H),\* 2.67-2.68 (m, 0.7 H),\* 3.21-3.25 (m, 0.3 H),\* 3.56-3.58 (m, 0.7 H), 6.27 (s, 0.7 H), 6.28 (s, 0.3 H),\* 6.96 (d, 1.4 H, *J* = 9.0 Hz), 6.97 (d, 0.6 H, *J* = 9.0 Hz),\* 8.13 (d, 2 H, *J* = 9.3 Hz); <sup>13</sup>C NMR(100 MHz, CDCl<sub>3</sub>) δ 9.97(15.3), 13.1(19.0), 21.2, 24.9, 34.5, 34.8, 34.9, 41.5(44.9), 42.8(46.6), 82.8(82.8), 118.0(117.9), 118.6(118.8), 125.4, 141.8, 160.3, 165.4(166.5), 197.3(198.2); IR (NaCl) 2937, 2862, 1660, 1606, 1590, 1514, 1492, 1448, 1341, 1299, 1262, 1241, 1147, 1112, 975, 958, 875, 849, 752, 693, 660 cm<sup>-1</sup>; mass spectrum (EI) *m/z* 361 (M<sup>+</sup>, 4.0); Anal. Calcd for C<sub>19</sub>H<sub>23</sub>NO<sub>4</sub>S: C, 63.13; H, 6.41, N, 3.88. Found: C, 62.98; H, 6.19, N, 4.15. \* Minor diastereomer

**The Pd/Cu-catalyzed Reaction of 1a with 2a in DMF-*d*<sub>7</sub> (Figure 2):** Into a dry Pyrex NMR tube were added PdCl<sub>2</sub> (4 x 10<sup>-3</sup> mmol), CuI (4 x 10<sup>-2</sup> mmol) and K<sub>2</sub>CO<sub>3</sub> (4 x 10<sup>-2</sup> mmol), **1a** (0.4 mmol), **2a** (0.52 mmol), NEt<sub>3</sub> (0.4 mmol), 1,4-dioxane (6.3 x 10<sup>-2</sup> mmol) as an internal standard and 0.5 mL of DMF-*d*<sub>7</sub> under N<sub>2</sub> atmosphere. The reaction at 80 °C was monitored by <sup>1</sup>H NMR spectroscopy.

**Synthesis of Authentic CH<sub>2</sub>=C(Me)C(O)C≡CC(Me)<sub>2</sub>(OH) (4a):**<sup>S1</sup> Into a two-necked reaction vessel were added CH<sub>2</sub>=C(Me)C(O)Cl (0.6 mL, 5.3 mmol) (0.6 mL, 5.3 mmol), **2a** (0.4 mL, 4.1 mmol), CuI (2.0 x 10<sup>-2</sup> mmol), Et<sub>3</sub>N (13 mL). After the solution was stirred for 44 h at 25 °C, the reaction mixture was filtrated through Celite and distilled. The compound **4a** was purified by HPLC (308 mg, 49%).

**4a:** colorless liquid; <sup>1</sup>H NMR (400 MHz, CDCl<sub>3</sub>) δ 1.55 (s, 6 H), 1.85 (s, 3 H), 2.91 (s, 1 H), 6.00 (s, 1 H), 6.38 (s, 1 H); <sup>13</sup>C NMR(100 MHz, CDCl<sub>3</sub>) δ 15.9, 30.6, 65.0, 78.9, 96.6, 131.3, 144.6, 180.1; mass spectrum (EI) *m/z* 152 (M<sup>+</sup>, 3.0); HRMS calcd for C<sub>15</sub>H<sub>17</sub>NO<sub>4</sub>S 152.0837, found 152.0829.

**Reaction of 4a with HSC<sub>6</sub>H<sub>4</sub>NO<sub>2</sub>-*p* (6a) (eq 2):** Into a two-necked reaction vessel were added K<sub>2</sub>CO<sub>3</sub> (4.4 x 10<sup>-2</sup> mmol), **4a** (0.4 mmol), **6a** (0.4 mmol), Et<sub>3</sub>N (60 μL, 0.43 mmol) and 0.5 mL of DMF under N<sub>2</sub> atmosphere. After the solution was stirred for 6 h at 80 °C, the reaction mixture was filtrated through Celite and distilled under reduced pressure.

**Synthesis of Authentic CH<sub>2</sub>=C(Me)C(O)C(H)=C(C(Me)<sub>2</sub>(OH))SC<sub>6</sub>H<sub>4</sub>NO<sub>2</sub>-*p* (5a):** Into a two-necked reaction vessel were added PdCl<sub>2</sub> (4.5 mg, 0.025 mmol), CuI (45 mg, 0.24 mmol), K<sub>2</sub>CO<sub>3</sub> (38 mg, 0.28 mmol), **1a** (536 mg, 2.40 mmol), **2a** (300 μL, 3.1 mmol), Et<sub>3</sub>N (340 μL, 2.4 mmol), and 0.5 mL of DMF under N<sub>2</sub> atmosphere. After the solution was stirred for 40 min at 80 °C, the resultant mixture was filtrated through Celite and distilled under reduced pressure. The compound **5a** was isolated by preparative TLC using hexane/Et<sub>2</sub>O/EtOH (10/7/1) as an eluent (291 mg, 39%).

**5a:** an yellow solid; mp 89 °C; <sup>1</sup>H NMR (400 MHz, CDCl<sub>3</sub>) δ 1.49 (s, 6 H), 1.74 (s, 3 H), 2.13 (s, 1 H), 5.86 (s, 1 H), 5.90 (s, 1 H), 7.36-7.39 (m, 3 H), 8.06 (d, 2 H, *J*<sub>H-H</sub> = 8.8 Hz); <sup>13</sup>C NMR(100 MHz, CDCl<sub>3</sub>) δ 16.8, 29.2, 31.0, 75.2, 123.9, 127.6, 127.9, 132.9, 144.9, 145.6, 145.7, 148.2, 193.8; NOE experiment: Irradiation of the singlet of homoallylic proton at δ 1.49 resulted in 6.4% enhancement of the signal at δ 7.39 (internal vinyl singlet) and the singlet of terminal *trans*-vinyl proton at δ 5.90 resulted in 2.9% enhancement of the signal at δ 7.39 (internal vinyl singlet); IR (KBr) 3452, 3098, 2977, 1652, 1595, 1575, 1514, 1340, 1182, 1109, 1090, 977, 851, 744, 686, 534, 466 cm<sup>-1</sup>; mass spectrum (EI) *m/z* 307 (M<sup>+</sup>, 133); Anal. Calcd for C<sub>15</sub>H<sub>17</sub>NO<sub>4</sub>S: C, 58.61; H, 5.57, N, 4.56. Found: C, 58.36; H, 5.32, N, 4.39.

**Intramolecular cyclization of 5a (eq 3):** Into a two-necked reaction vessel were added CH<sub>2</sub>=C(Me)C(O)-CH=C(SC<sub>6</sub>H<sub>4</sub>NO<sub>2</sub>-*p*)C(Me)<sub>2</sub>(OH) (**5a**) (0.2 mmol), Et<sub>3</sub>N (30 μL, 0.21 mmol) and 0.25 mL of DMF under N<sub>2</sub> atmosphere. After the solution was stirred for 6 h at 80 °C, the reaction mixture was filtrated through Celite, and distilled under reduced pressure.

**ORTEP Diagram of 3a:** Space group monoclinic,  $P2_1/a(\#14)$  with  $a = 11.1771(4) \text{ \AA}$ ,  $b = 14.9463(5) \text{ \AA}$ ,  $c = 11.0961(6) \text{ \AA}$ ,  $\beta = 1212.578(1)^\circ$ ,  $Z = 4$ ,  $\rho = 1.307 \text{ g/cm}^3$ ,  $R = 0.074$ , and  $R_w = 0.184$ .

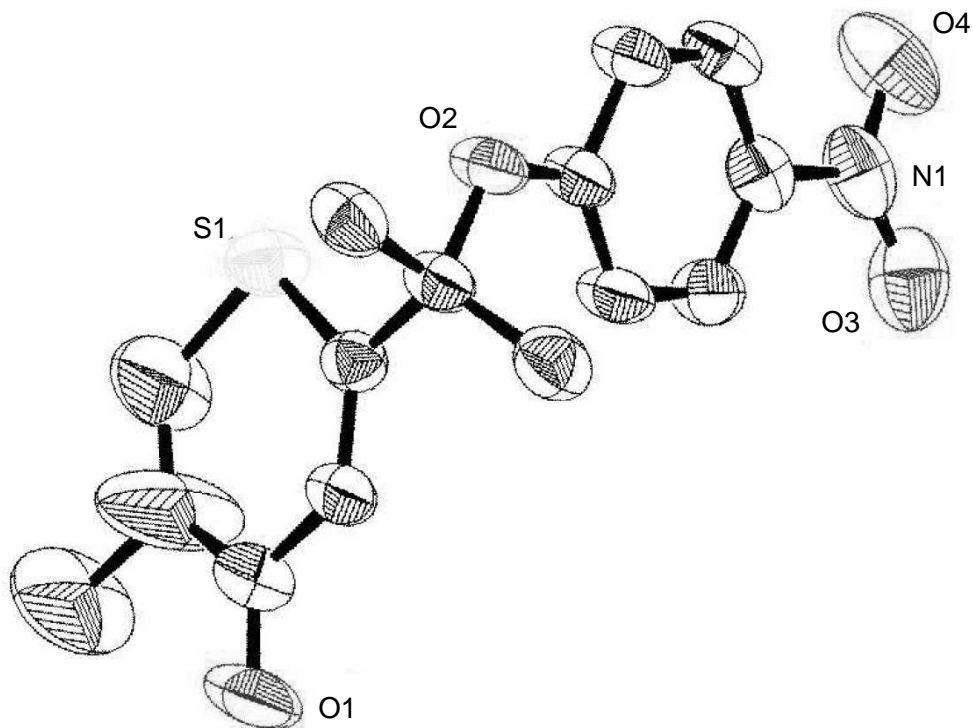

**Figure 1S.** Molecular structure of **3a**.

## References

S1) Chowdhury, C.; Kundu, N. G. *Tetrahedron* **1999**, 55, 7011.



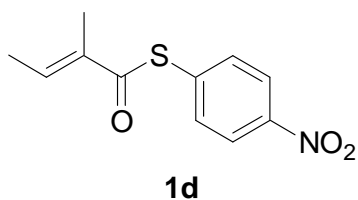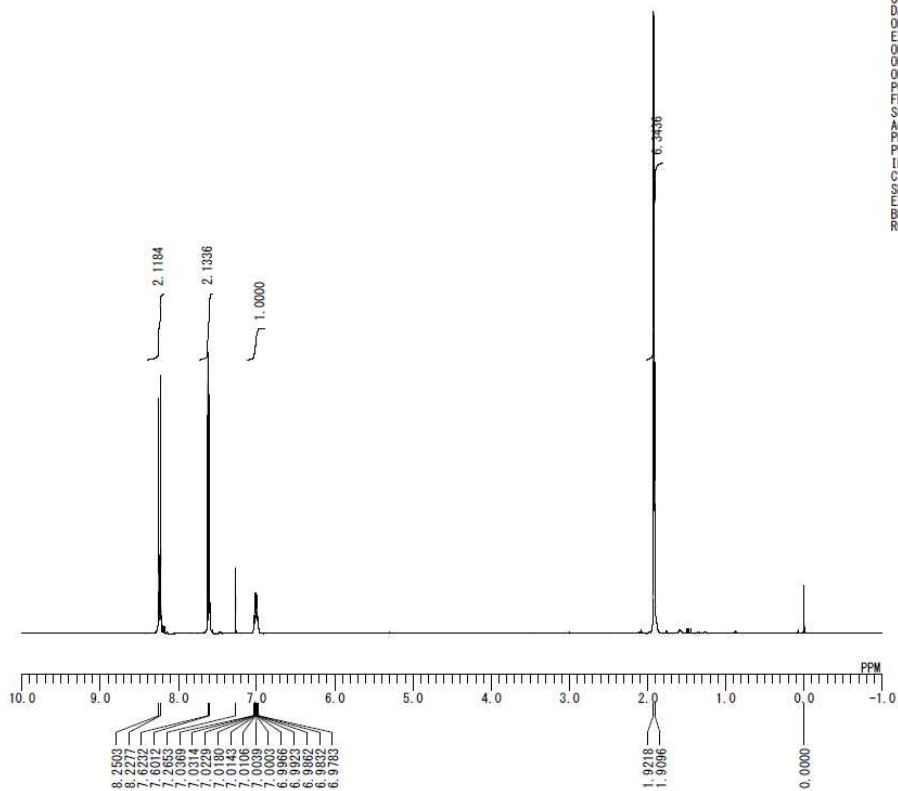

DFILE \\Ffs3\\kambe\_lab3\\11. 分析装  
 COMNT  
 DATIM Wed Feb 13 17:19:17 2008  
 GENUC 1H  
 EXMOD NON  
 OBFRQ 399.65 MHz  
 OBSET 124.00 KHz  
 OBFIN 10500.00 Hz  
 POINT 32768  
 FREQU 8000.00 Hz  
 SCANS 16  
 ACQTM 4.0960 sec  
 PD 2.9040 sec  
 FWT 7.20 usec  
 LRNUC 1H  
 CTMP 20.8 c  
 SLVNT CDCL3  
 EXREF 0.00 ppm  
 BF 0.12 Hz  
 RGAIN 11

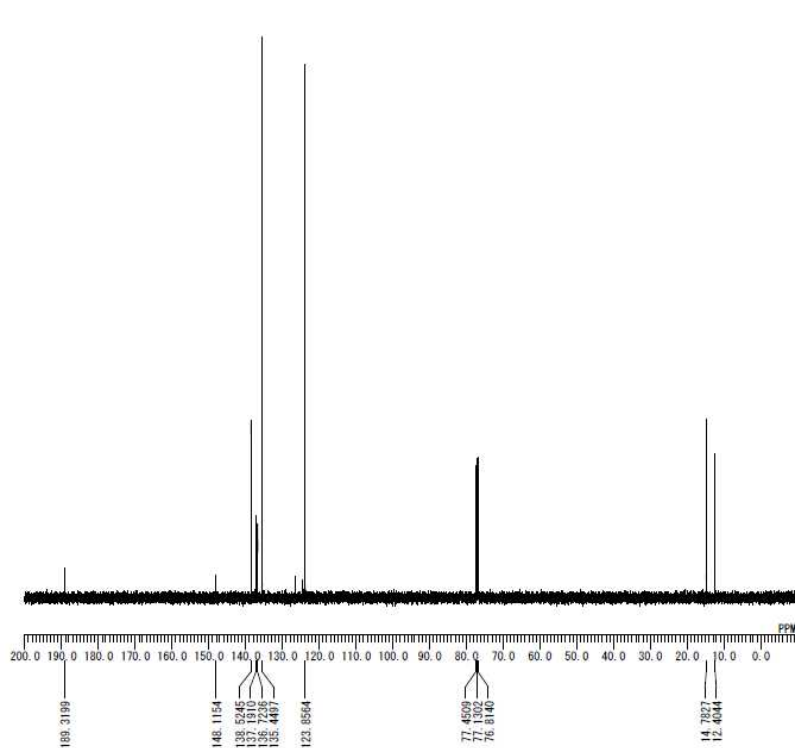

DFILE \\Ffs3\\kambe\_lab3\\11. 分析装置データ\\11. N  
 COMNT  
 DATIM Wed Feb 13 17:36:51 2008  
 GENUC 13C  
 EXMOD BCM  
 OBFRQ 100.40 MHz  
 OBSET 125.00 KHz  
 OBFIN 10500.00 Hz  
 POINT 65536  
 FREQU 30188.68 Hz  
 SCANS 243  
 ACQTM 2.1709 sec  
 PD 1.9120 sec  
 FWT 8.00 usec  
 LRNUC 1H  
 CTMP 21.8 c  
 SLVNT CDCL3  
 EXREF 0.00 ppm  
 BF 0.12 Hz  
 RGAIN 25

<sup>1</sup>H and <sup>13</sup>C NMR spectrum for **1d**

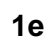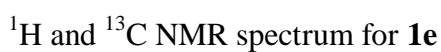

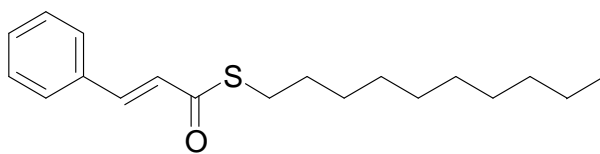

1f

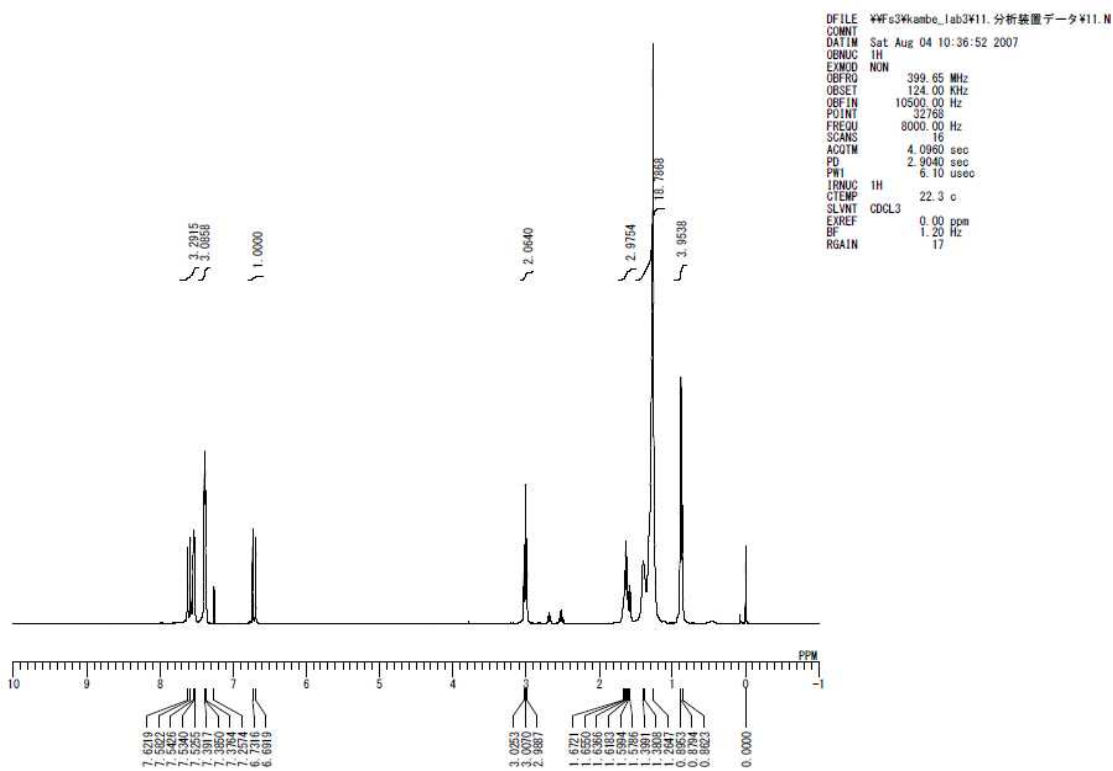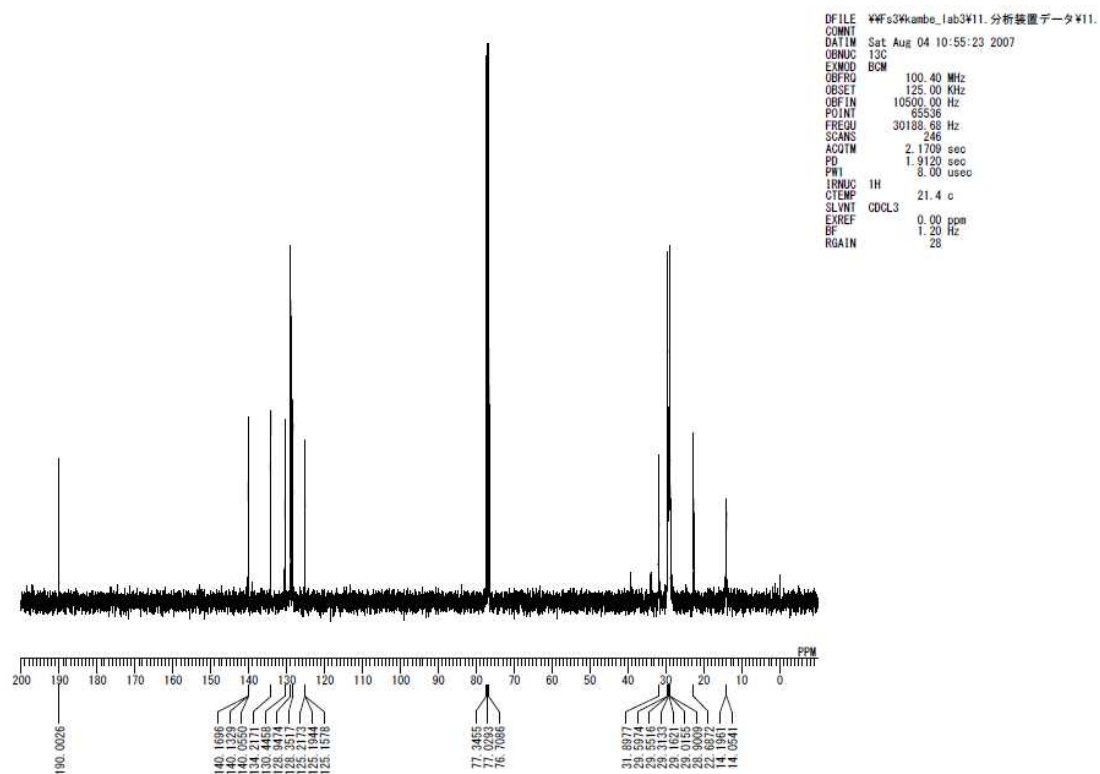

$^1\text{H}$  and  $^{13}\text{C}$  NMR spectrum for 1f

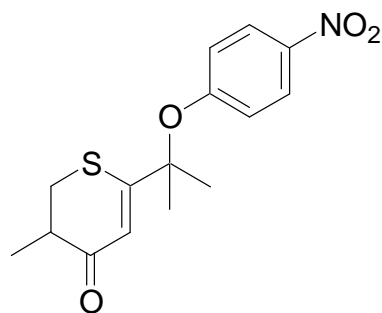

**3a**

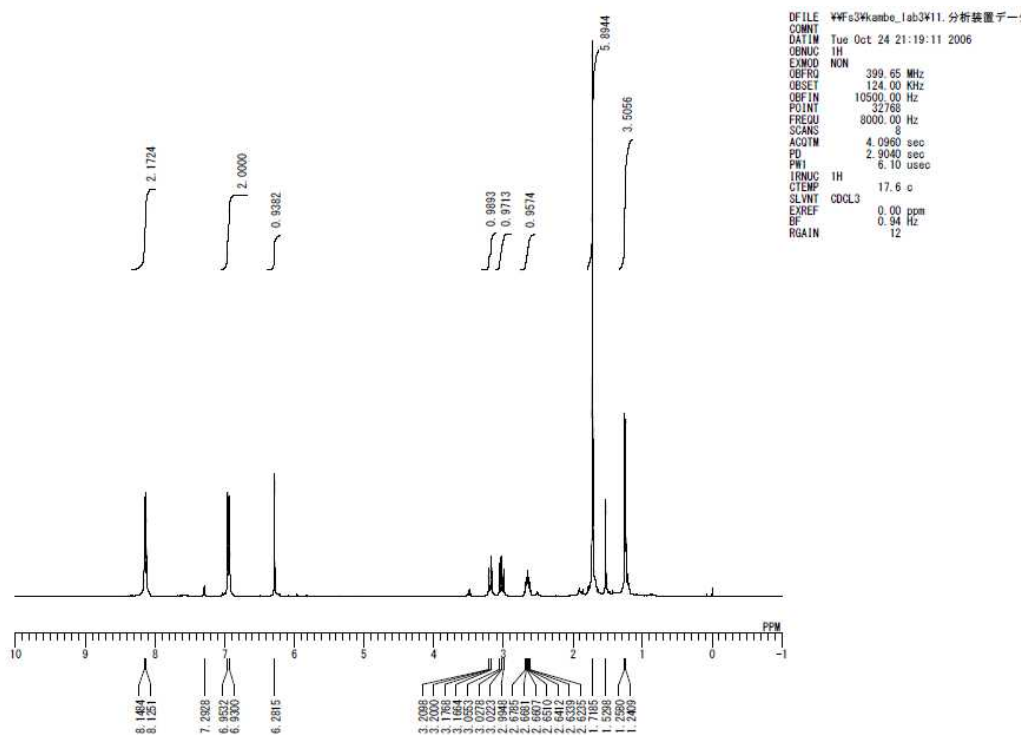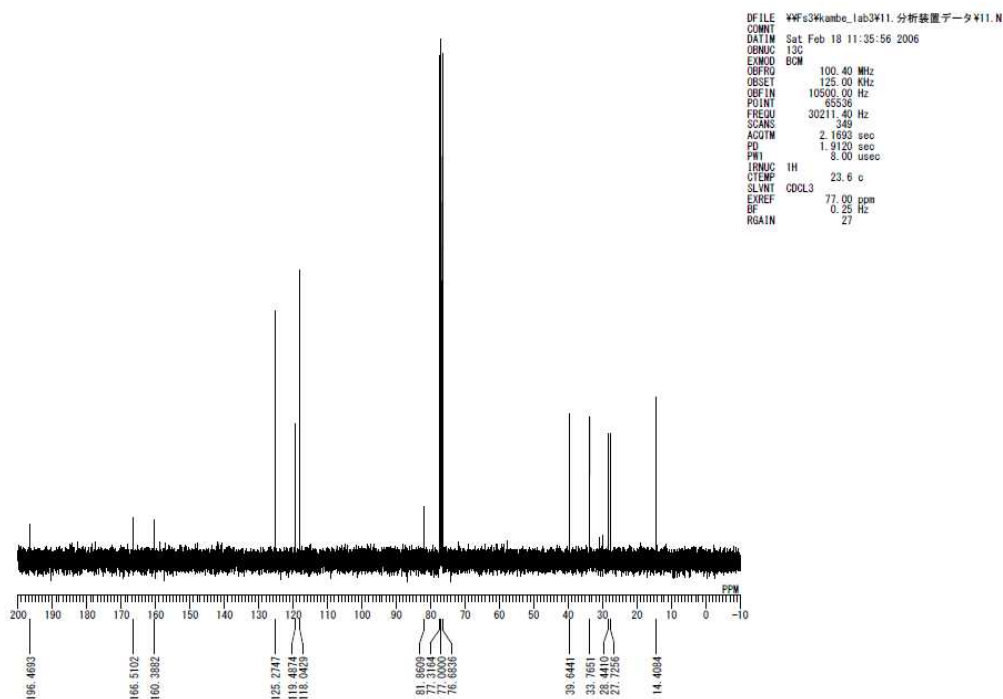

<sup>1</sup>H and <sup>13</sup>C NMR spectrum for **3a**

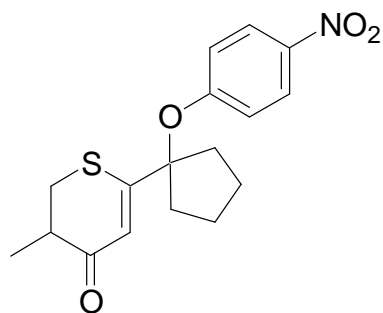

**3b**

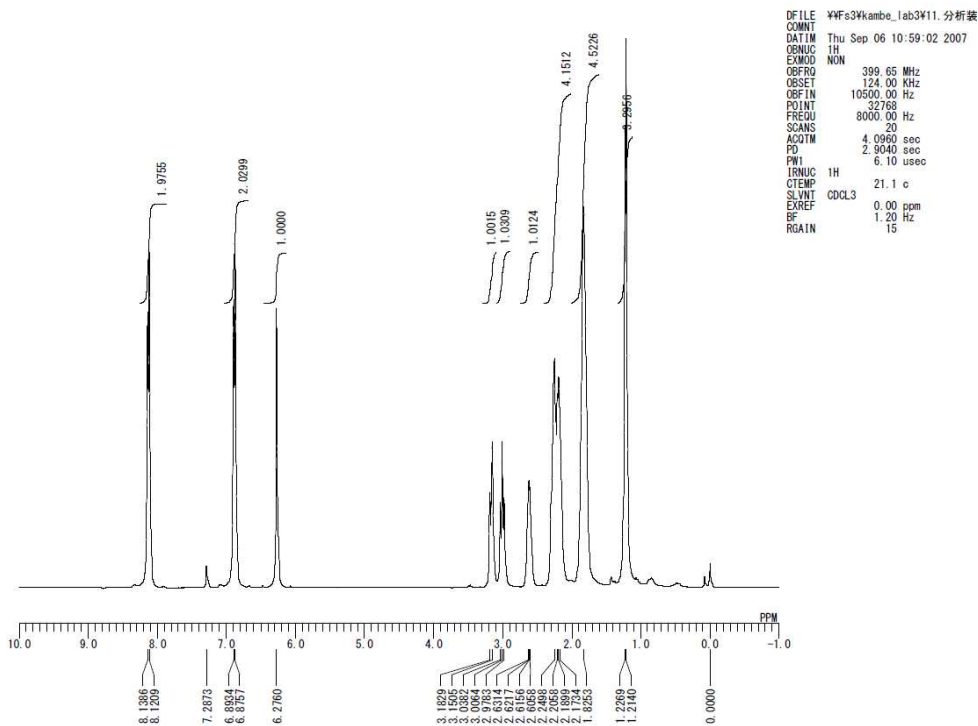

DFILE WFs3Wkambe\_lab3W11\_分析装置  
 COMMT Thu Sep 06 10:59:02 2007  
 DATIM 1H  
 OBNUC NON  
 EXMOD  
 OFRQ 399.65 MHz  
 OBSET 124.00 KHz  
 OFIN 10500.00 Hz  
 POINT 32768  
 FREQU 8000.00 Hz  
 SCANS 20  
 ACQTM 4.0960 sec  
 PD 2.9040 sec  
 PW1 6.10 usec  
 IRNUC 1H  
 CTMP 21.1 c  
 SLVNT CDCL3  
 EXREF 0.00 ppm  
 BF 1.20 Hz  
 RGAIN 15

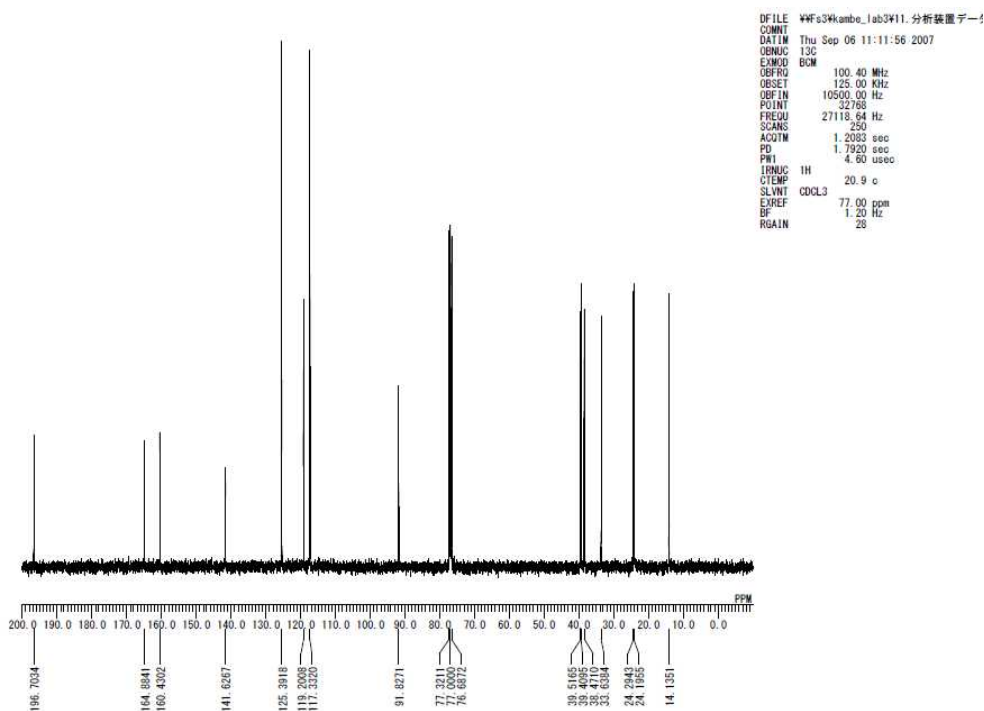

DFILE WFs3Wkambe\_lab3W11\_分析装置デー  
 COMMT Thu Sep 06 11:11:56 2007  
 DATIM 13C  
 OBNUC BCM  
 EXMOD  
 OFRQ 100.40 MHz  
 OBSET 125.00 KHz  
 OFIN 10500.00 Hz  
 POINT 32768  
 FREQU 27118.64 Hz  
 SCANS 250  
 ACQTM 1.2083 sec  
 PD 1.7920 sec  
 PW1 4.60 usec  
 IRNUC 1H  
 CTMP 20.9 c  
 SLVNT CDCL3  
 EXREF 77.00 ppm  
 BF 1.20 Hz  
 RGAIN 28

**<sup>1</sup>H and <sup>13</sup>C NMR spectrum for 3b**

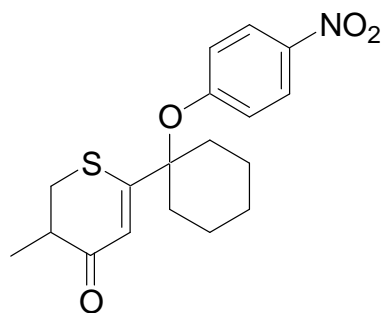

**3c**

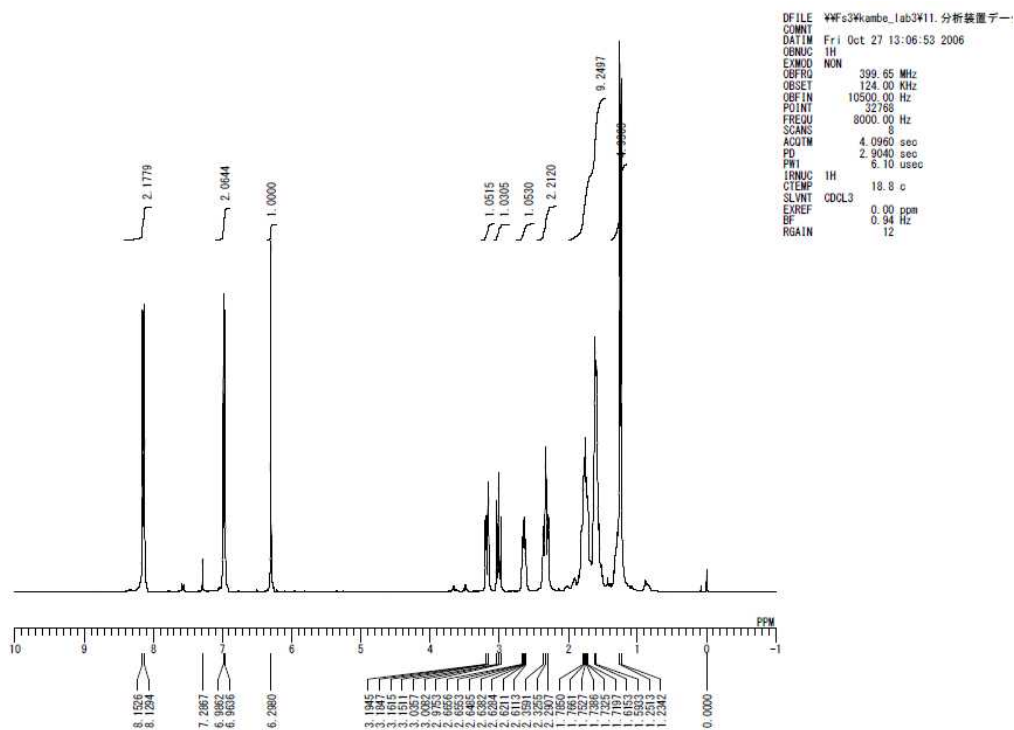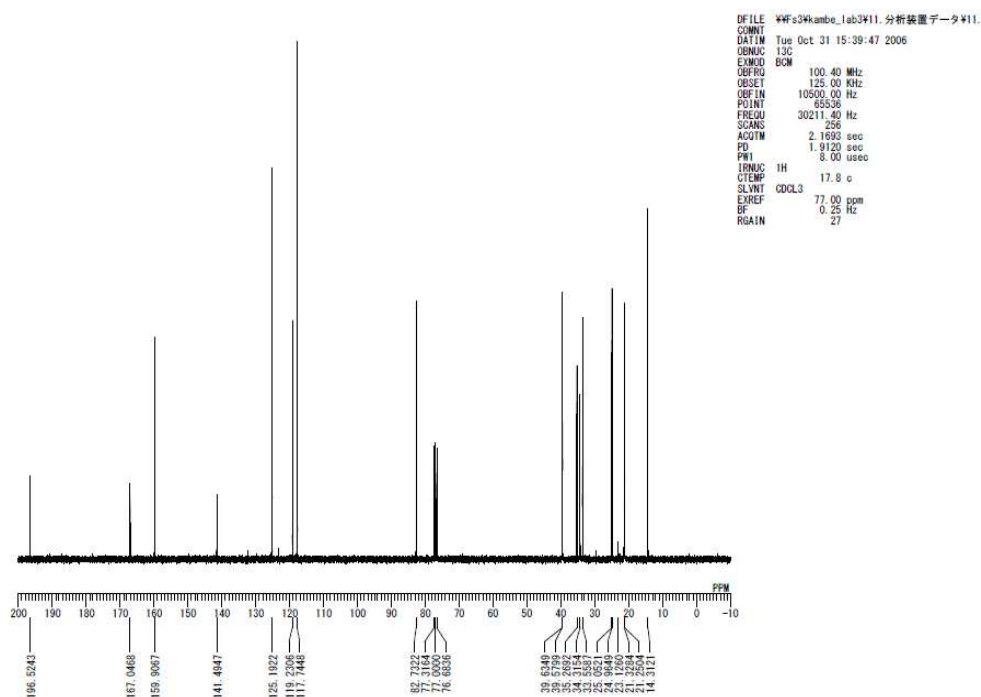

<sup>1</sup>H and <sup>13</sup>C NMR spectrum for **3c**

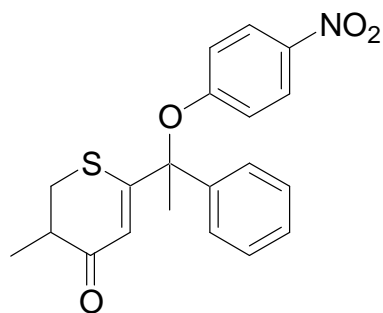

**3d**

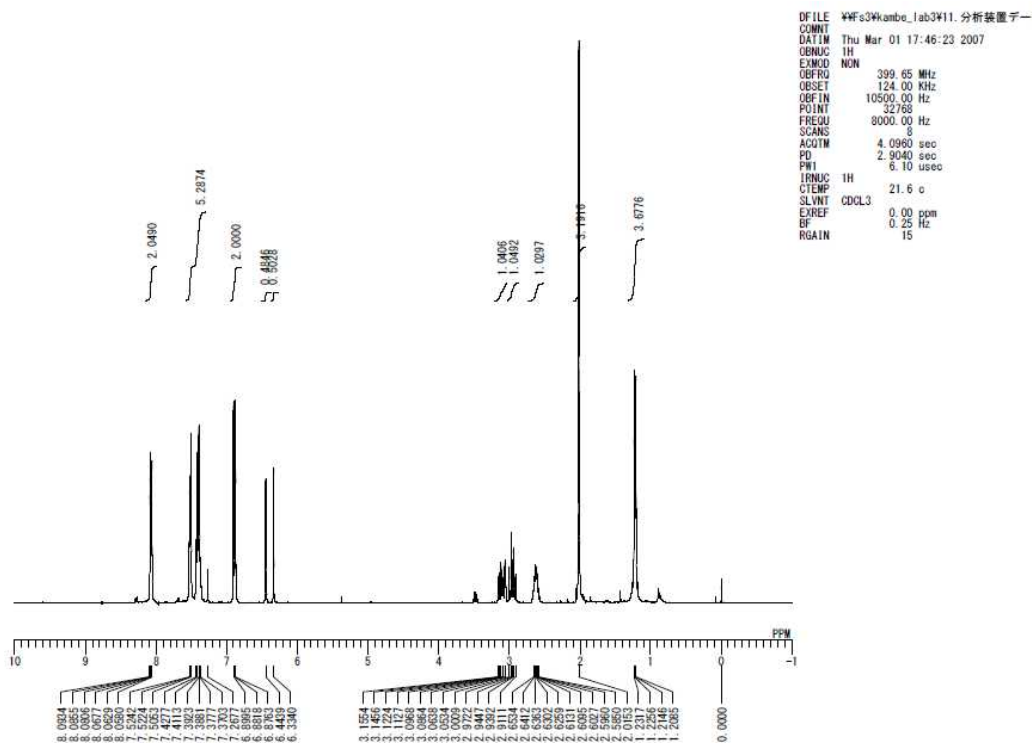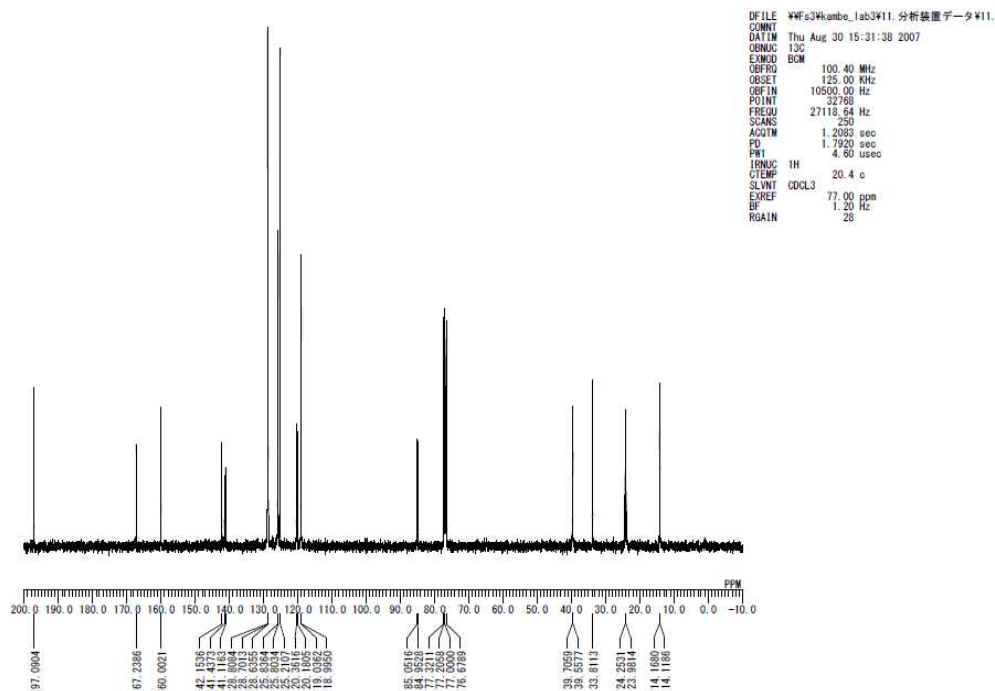

<sup>1</sup>H and <sup>13</sup>C NMR spectrum for **3d**

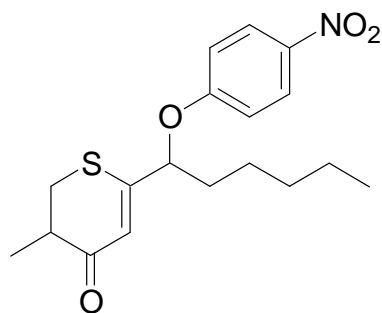

**3e**

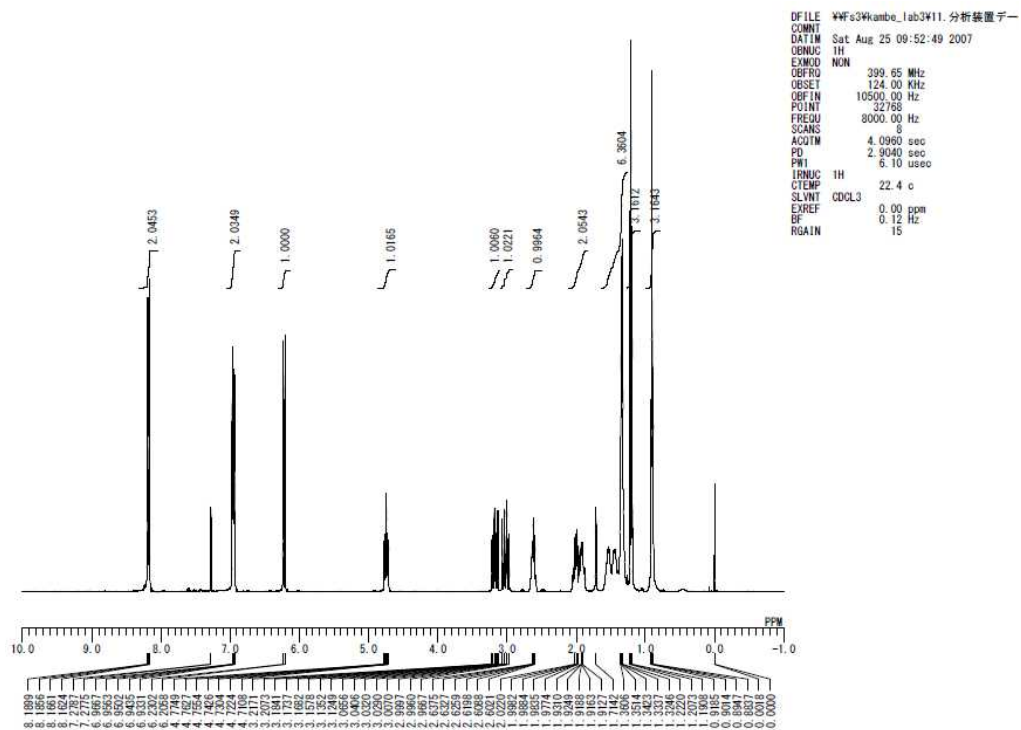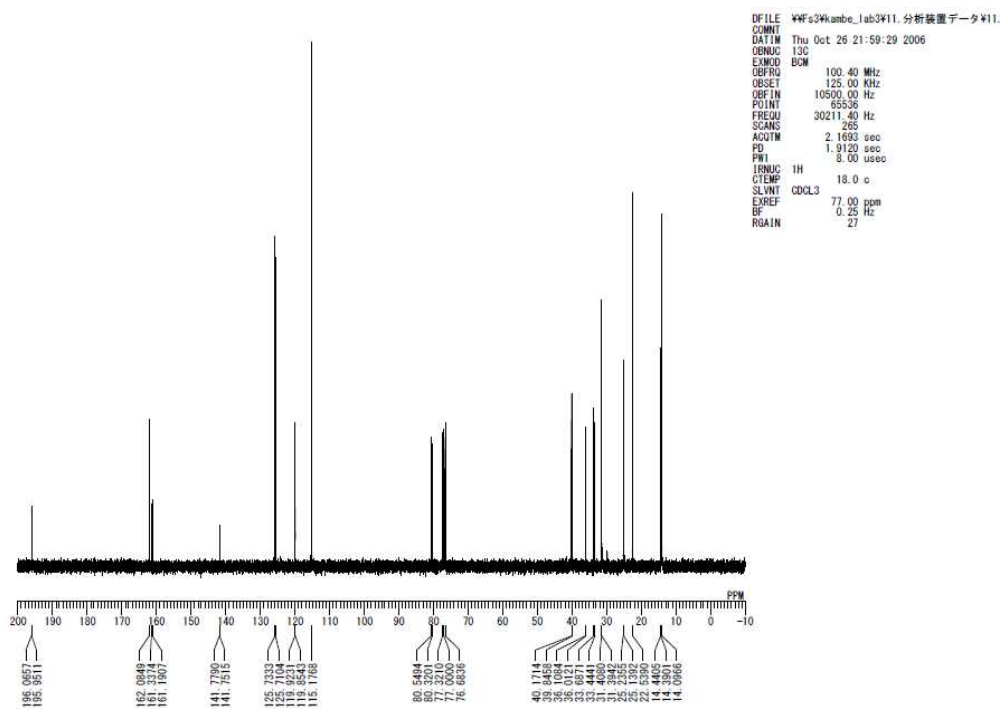

<sup>1</sup>H and <sup>13</sup>C NMR spectrum for **3e**





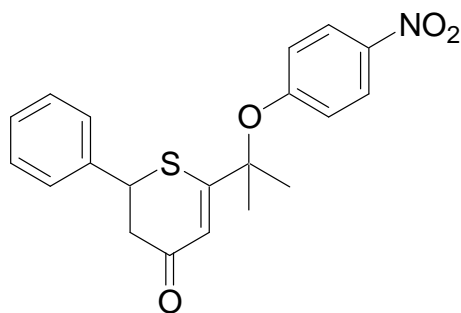

**3h**

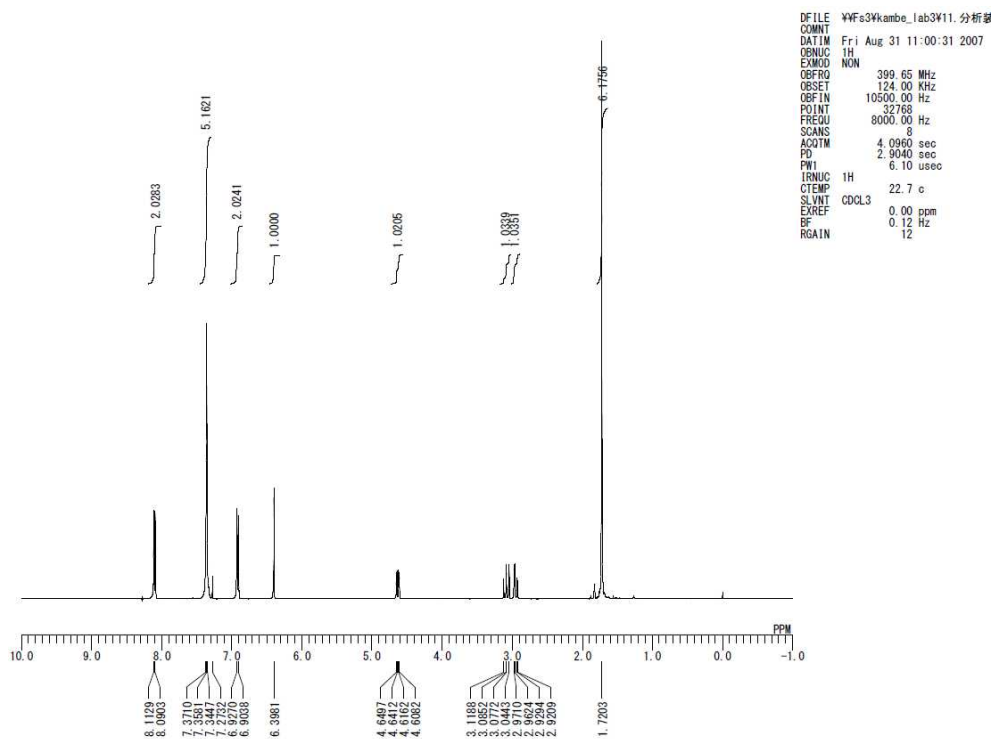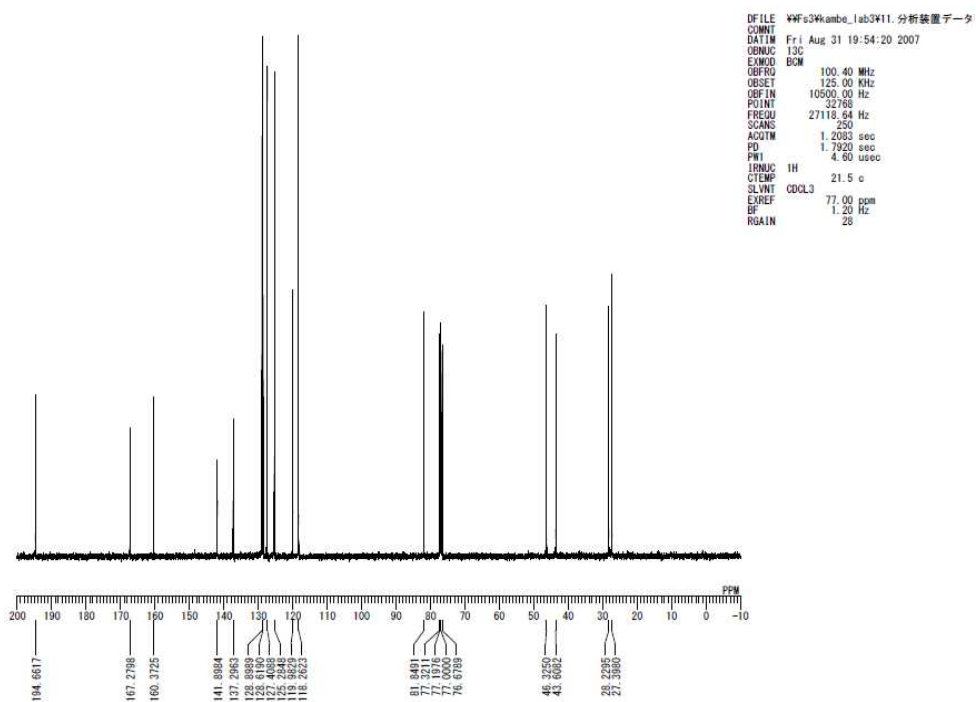

**<sup>1</sup>H and <sup>13</sup>C NMR spectrum for 3h**

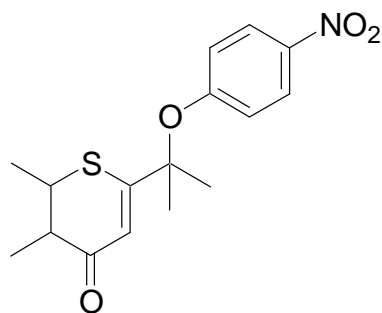

**3i**

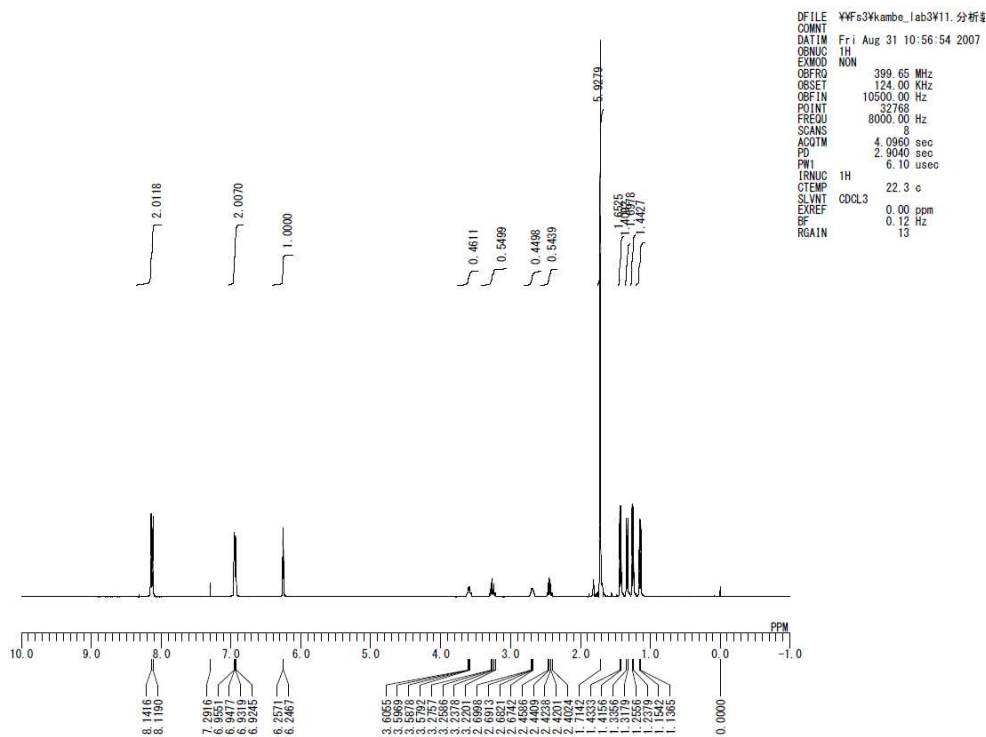

DFILE WFs3Wkambe\_lab3W11. 分析装置  
 COUNT  
 DATIM Fri Aug 31 10:56:54 2007  
 OBNUC 1H  
 EXMOD NON  
 OFPRO 399.65 MHz  
 OBSET 124.00 KHz  
 OFBIN 10500.00 Hz  
 POINT 32768  
 FREQU 80000.00 Hz  
 SCANS 8  
 ACQTM 4.0960 sec  
 PD 2.8040 sec  
 PWI 6.10 usec  
 IRNUC 1H  
 CTMP 22.3 c  
 SLVNT CDCL3  
 EXREF 0.00 ppm  
 BF 0.12 Hz  
 RGAIN 13

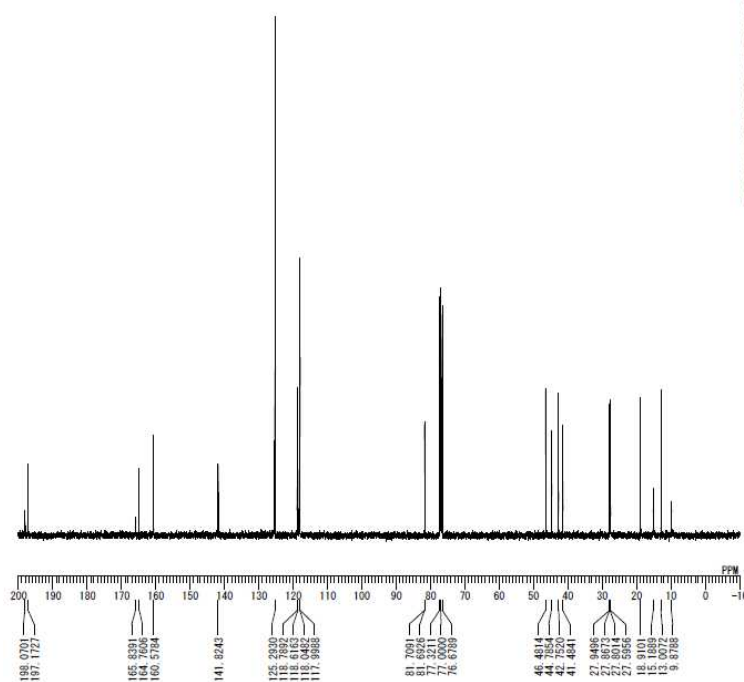

**<sup>1</sup>H and <sup>13</sup>C NMR spectrum for 3i**



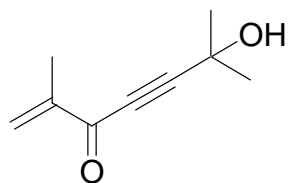

4a

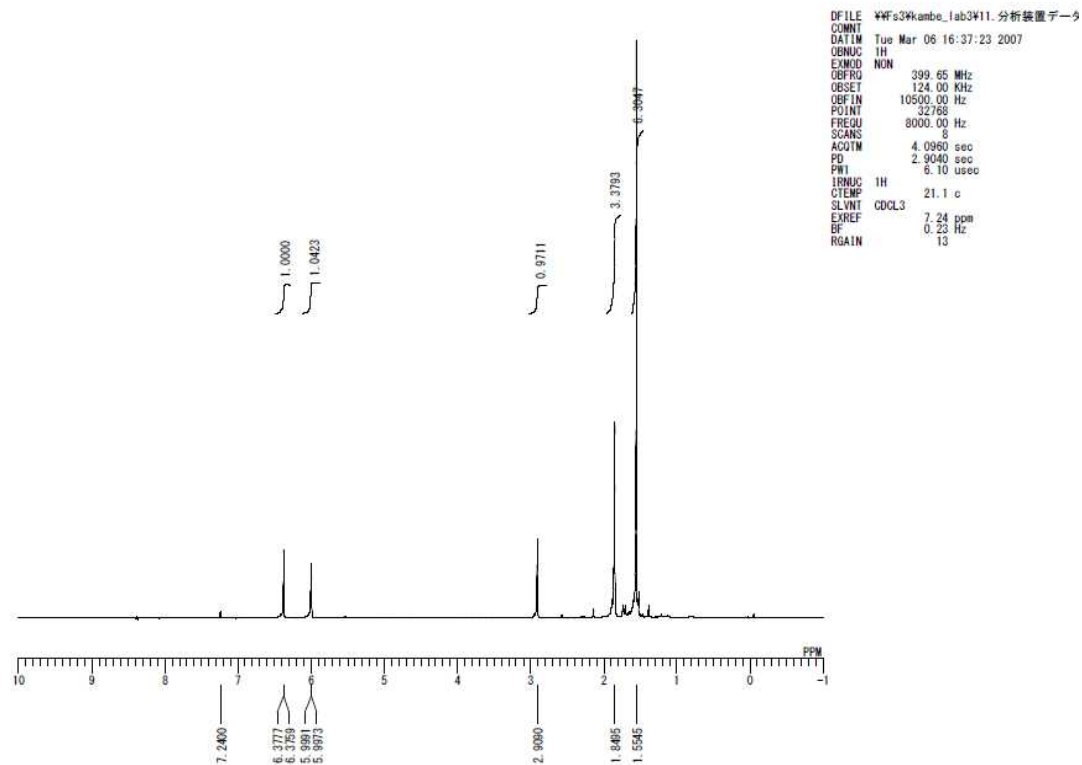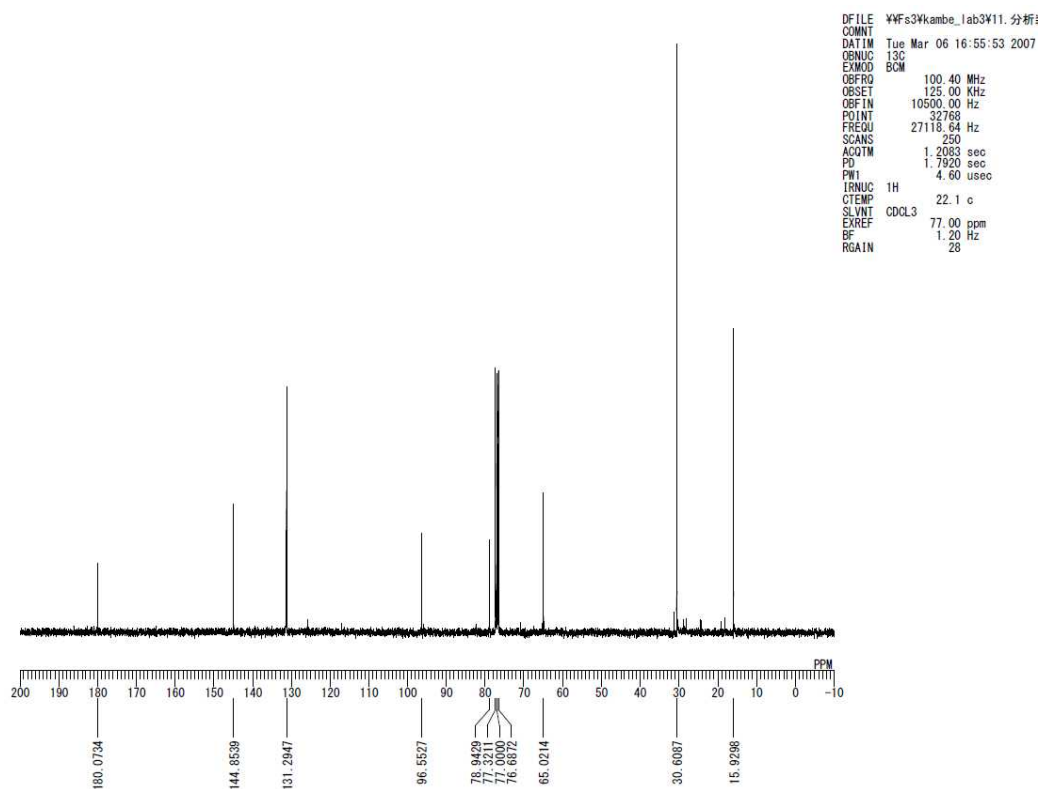

$^1\text{H}$  and  $^{13}\text{C}$  NMR spectrum for 4a

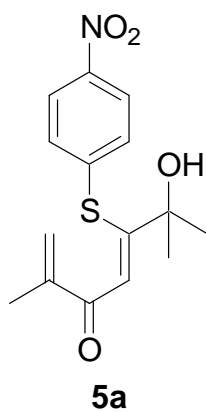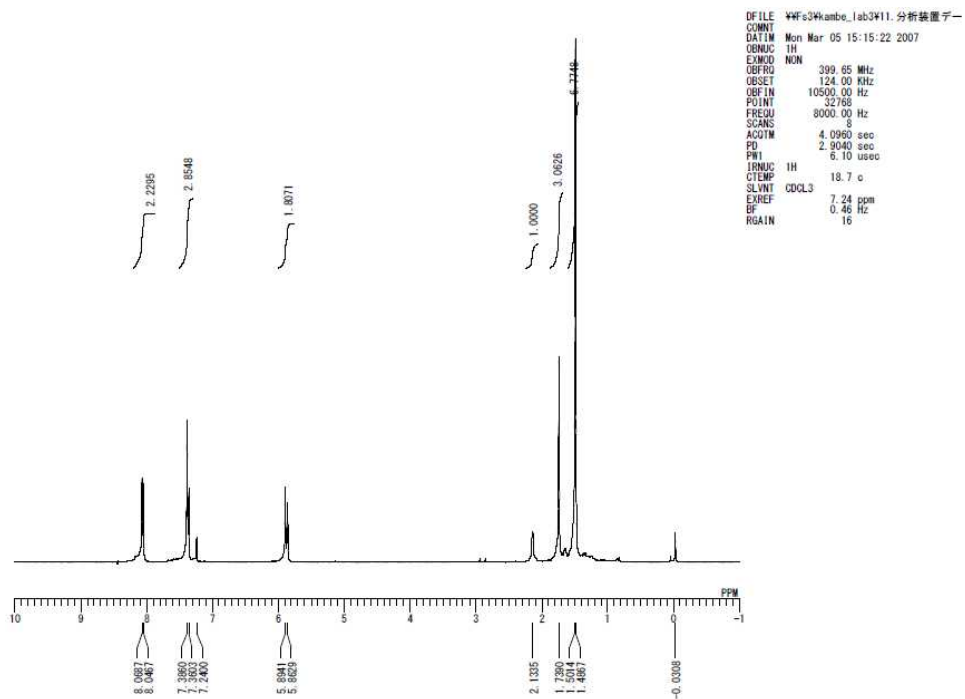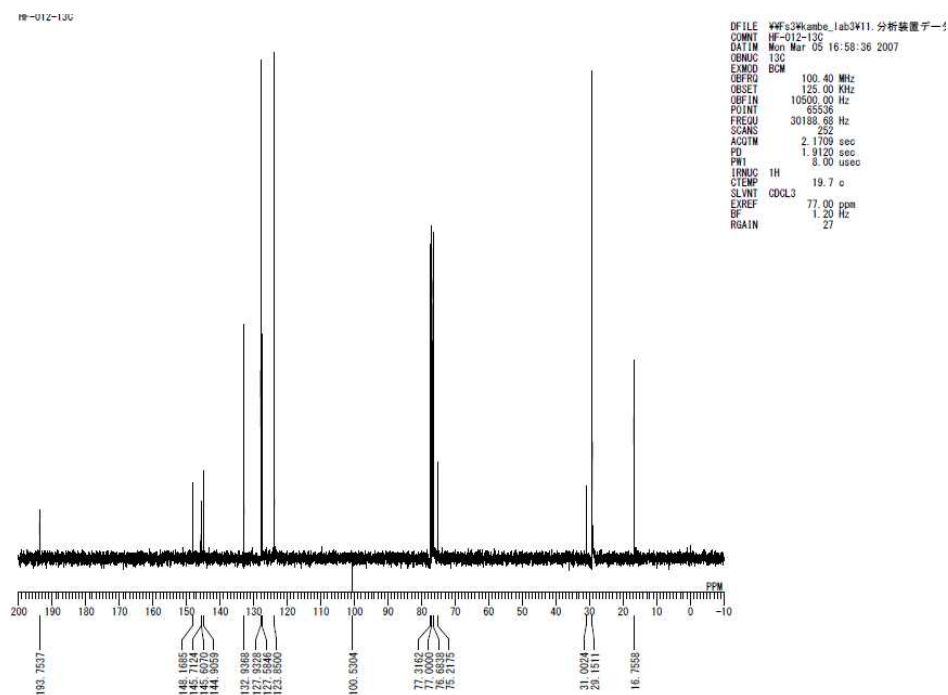

<sup>1</sup>H and <sup>13</sup>C NMR spectrum for **5a**

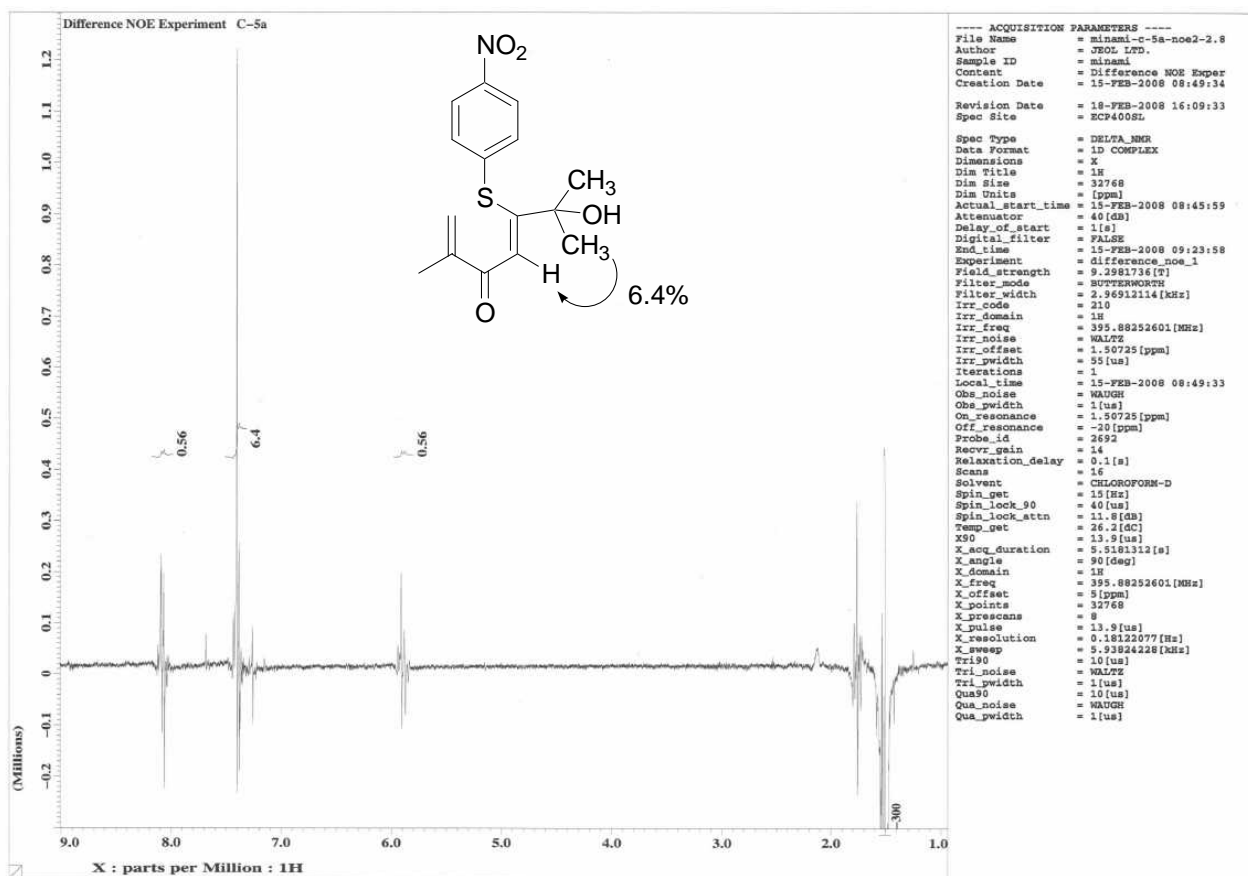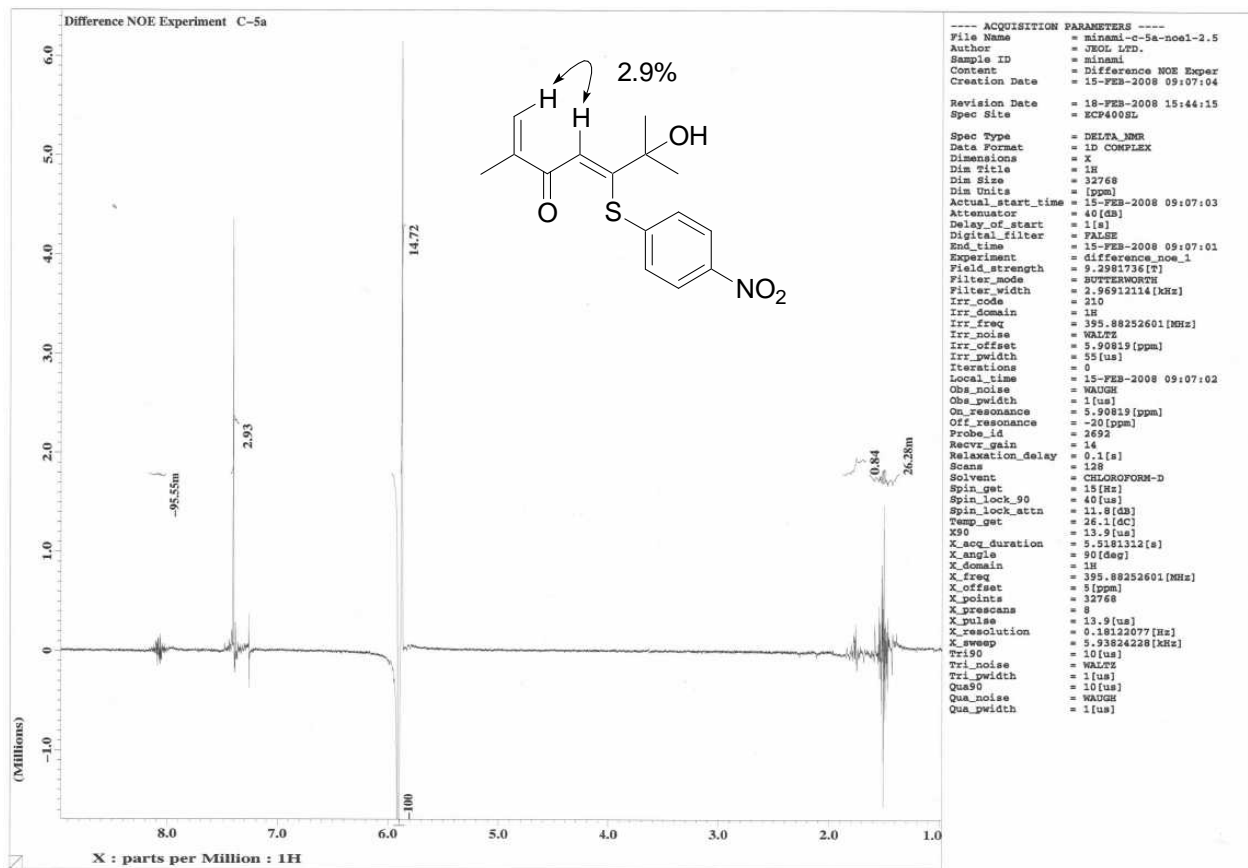

Difference NOE Experiment for 5a
